# Supplementary material for: High thermoelectric performance of p-BiSbTe compounds prepared by ultra-fast thermally induced reaction
Source: Royal Society of Chemistry journal article supplement (doi:10.1039/c7ee02677c), 2017-01-01
Supplement: c7ee02677c1.pdf [file c7ee02677c1.pdf]

## **High thermoelectric performance of p-BiSbTe compounds prepared by ultra-fast thermally induced reaction**

Gang Zheng,<sup>a</sup> Xianli Su,<sup>a, c, †</sup> Hongyao Xie,<sup>a</sup> Yuejiao Shu,<sup>a</sup> Tao Liang,<sup>a</sup> Xiaoyu She,<sup>a</sup>  
Wei Liu,<sup>a</sup> Yonggao Yan,<sup>a</sup> Qingjie Zhang,<sup>a</sup> Ctirad Uher,<sup>b</sup> Mercouri G Kanatzidis,<sup>c, †</sup>  
Xinfeng Tang<sup>a, †</sup>

<sup>a</sup> *State Key Laboratory of Advanced Technology for Materials Synthesis and Processing, Wuhan University of Technology, Wuhan 430070, China*

<sup>b</sup> *Department of Physics, University of Michigan, Ann Arbor, Michigan 48109, USA*

<sup>c</sup> *Department of Chemistry, Northwestern University, Evanston, Illinois 60208, USA*

<sup>†</sup> Correspondence to: X. Su (suxianli@whut.edu.cn), M. G. K. (m-kanatzidis@northwestern.edu),  
X. Tang (tangxf@whut.edu.cn).

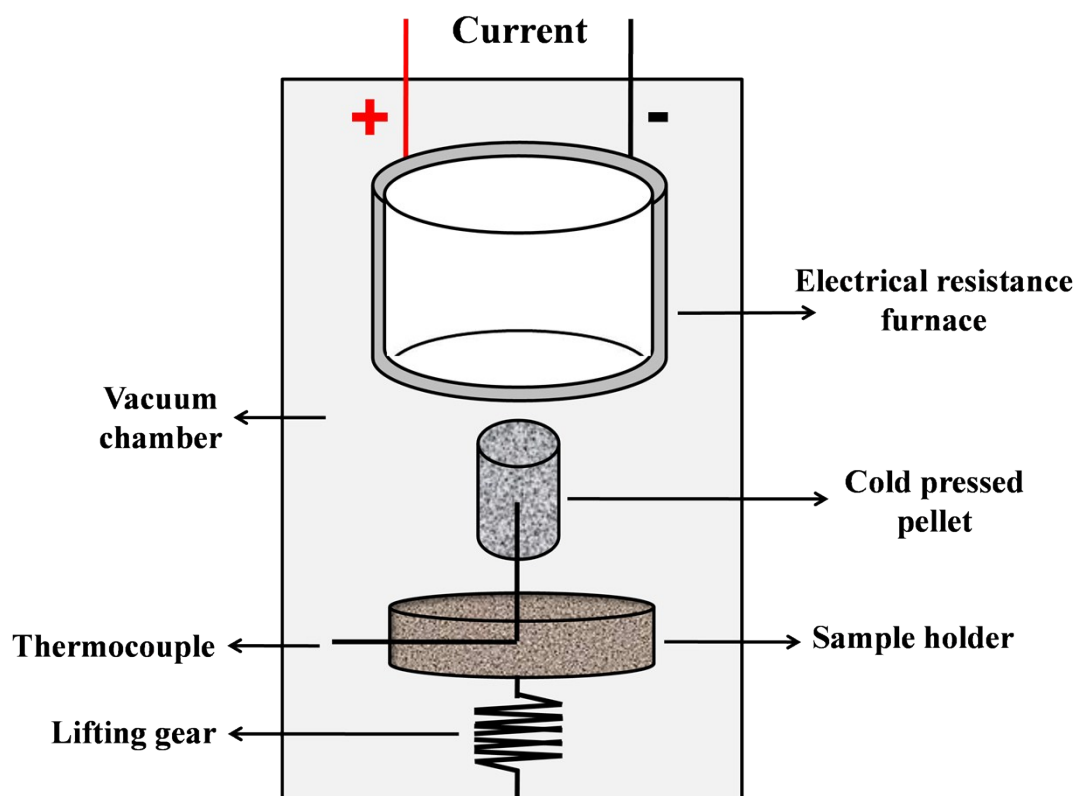

Figure S1: Schematic diagram of an apparatus to measure the temperature profile during the thermally induced flash synthesis

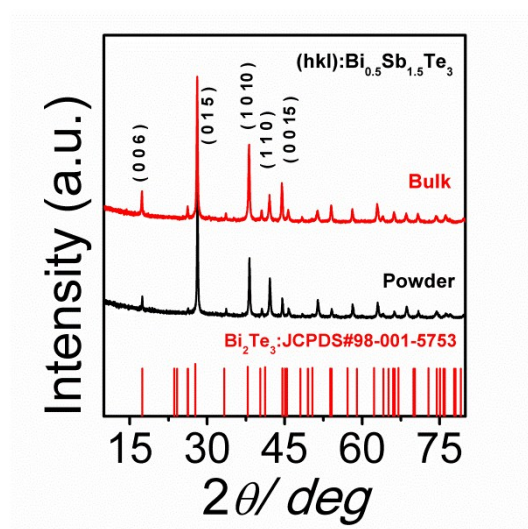

Figure S2: XRD patterns of  $\text{Bi}_{0.5}\text{Sb}_{1.5}\text{Te}_3$  after TIFS and PAS processing.

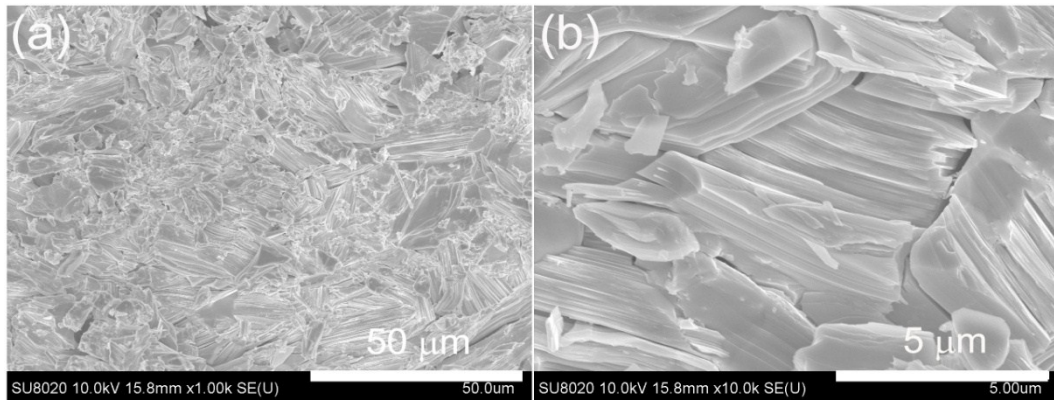

Figure S3: (a) FESEM of  $\text{Bi}_{0.5}\text{Sb}_{1.5}\text{Te}_3$  processed by TIFS -PAS; (b) high-magnification FESEM of  $\text{Bi}_{0.5}\text{Sb}_{1.5}\text{Te}_3$  processed by TIFS-PAS.

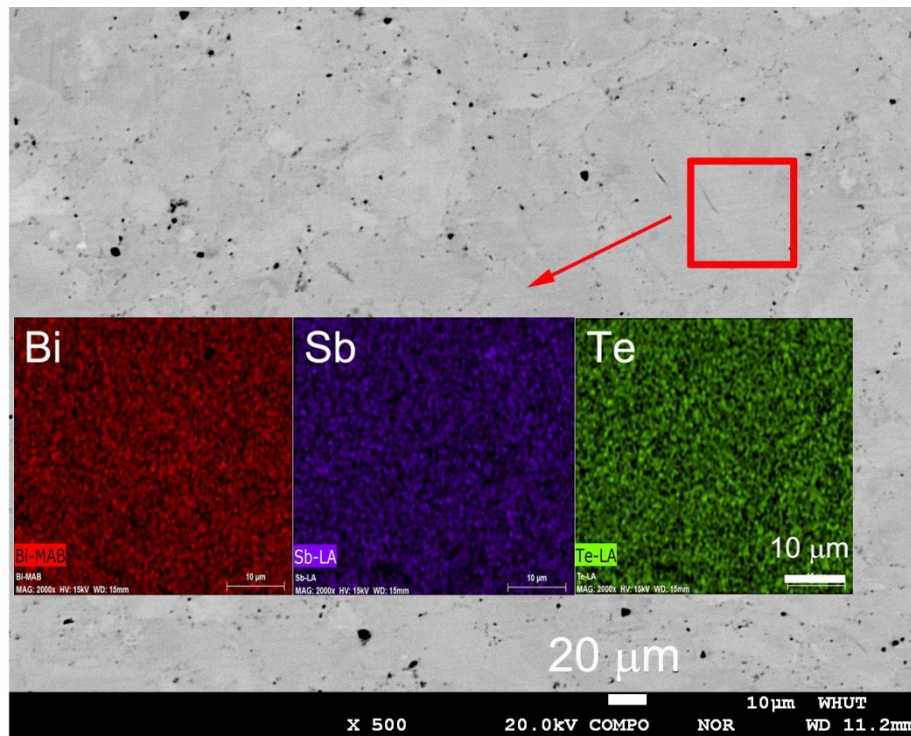

Figure S4: Back-scattered electron image of a polished surface of  $\text{Bi}_{0.5}\text{Sb}_{1.5}\text{Te}_3$  processed by thermally induced flash synthesis at 823 K for 3 min. Insets show elemental distributions.

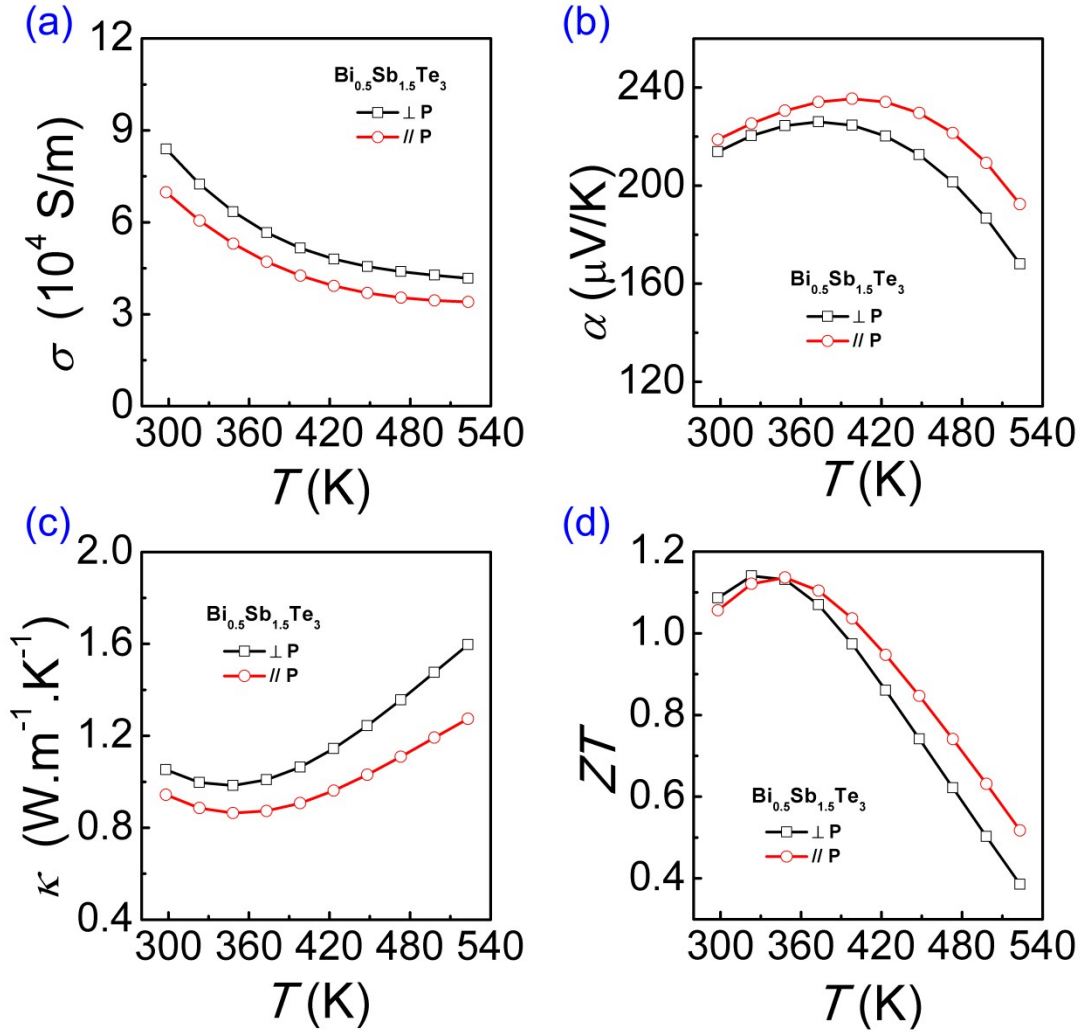

Figure S5: Thermoelectric properties of  $\text{Bi}_{0.5}\text{Sb}_{1.5}\text{Te}_3$  processed by TIFS-PAS. (a) Electrical conductivity; (b) Seebeck coefficient; (c) Thermal conductivity; (d) Dimensionless figure of merit  $ZT$ .

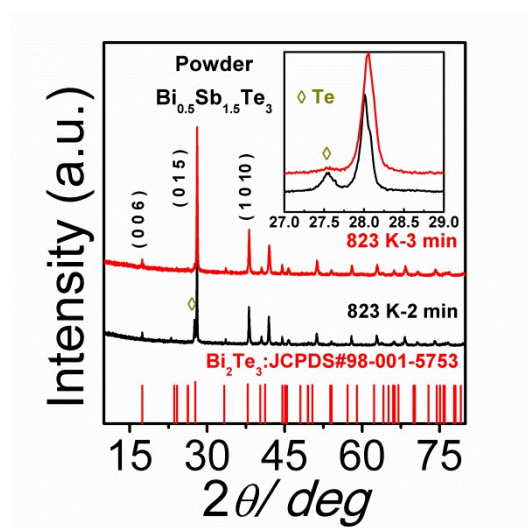

Figure S6: XRD patterns of  $\text{Bi}_{0.5}\text{Sb}_{1.5}\text{Te}_3$  after thermally induced flash synthesis at 823 K for 2 min and 3 min duration. The inset is an expanded view of the  $2\theta$  interval between  $27^\circ$  and  $29^\circ$ .

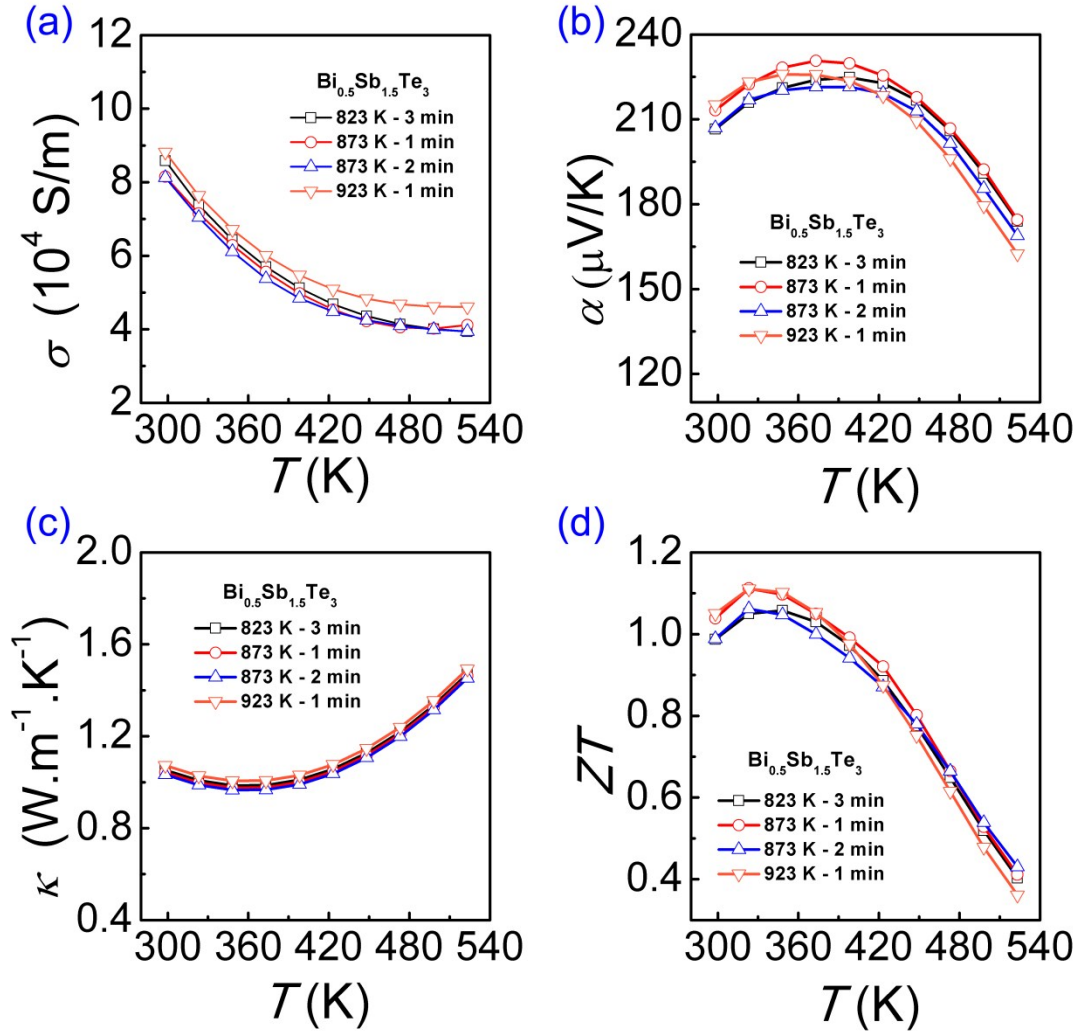

Figure S7: Thermoelectric properties of  $\text{Bi}_{0.5}\text{Sb}_{1.5}\text{Te}_3$  processed under different thermally induced flash synthesis parameters.

- (a) Electrical conductivity; (b) Seebeck coefficient; (c) Thermal conductivity; (d) Dimensionless figure of merit  $ZT$ .



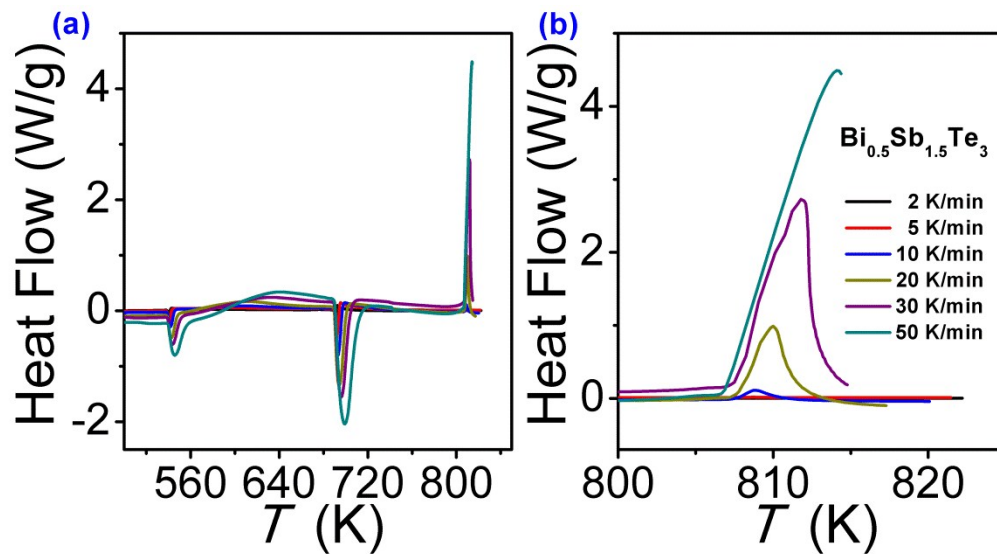

Figure S8: Heat flow curve of  $\text{Bi}_{0.5}\text{Sb}_{1.5}\text{Te}_3$  showing signatures of the presence of Bi, Sb and Te at different temperatures (the upper peak and valley are corresponding to exothermic and endothermic process respectively.):  
 (a) Temperature range of 500 K~850 K; (b) Detailed view of the 800 K ~825 K range.

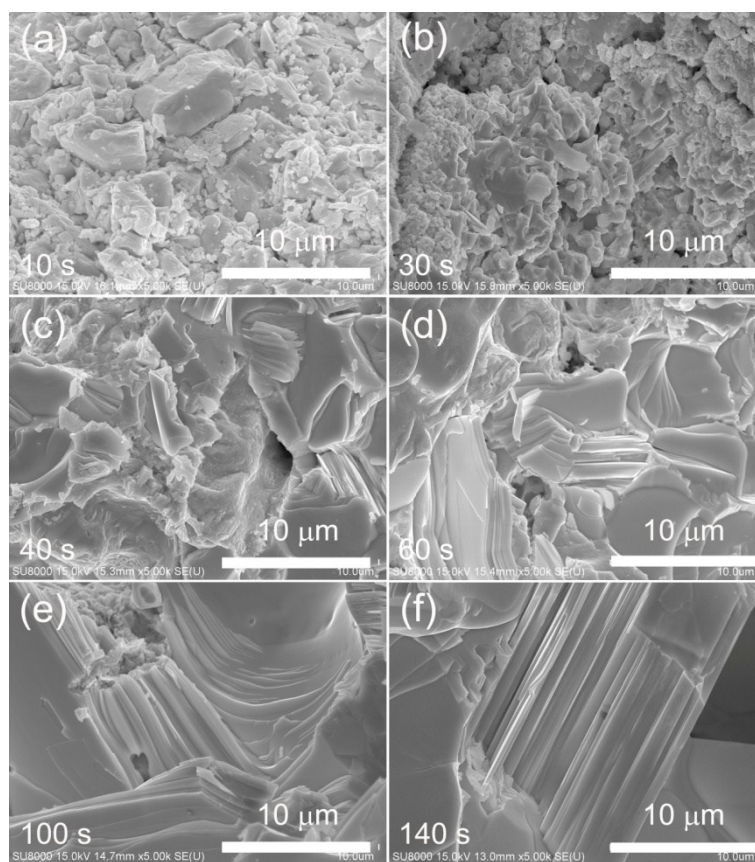

Figure S9: FESEM images of  $\text{Bi}_{0.5}\text{Sb}_{1.5}\text{Te}_3$  at different stage of thermally induced flash synthesis process at 823 K (a) 10 s; (b) 30 s; (c) 40 s; (d) 60 s; (e) 100 s; (f) 140 s.

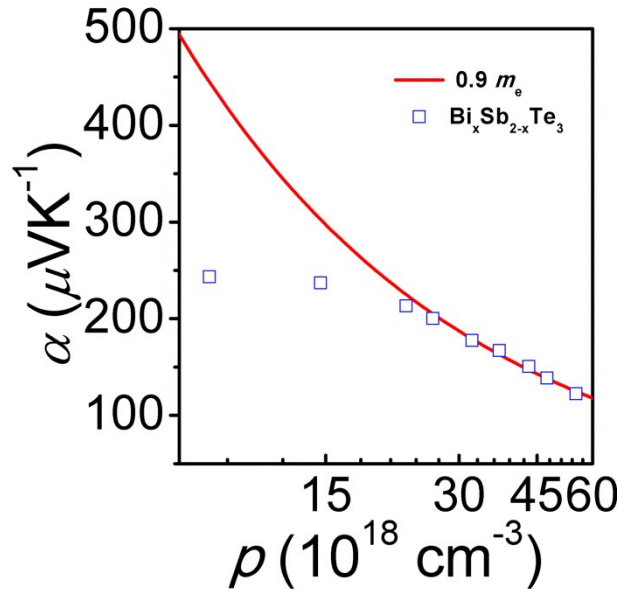

Figure S10: Room temperature Seebeck coefficient of  $\text{Bi}_x\text{Sb}_{2-x}\text{Te}_3$  samples synthesized by TIFS-PAS and plotted as a function of the carrier concentration (the Pisarenko plot)

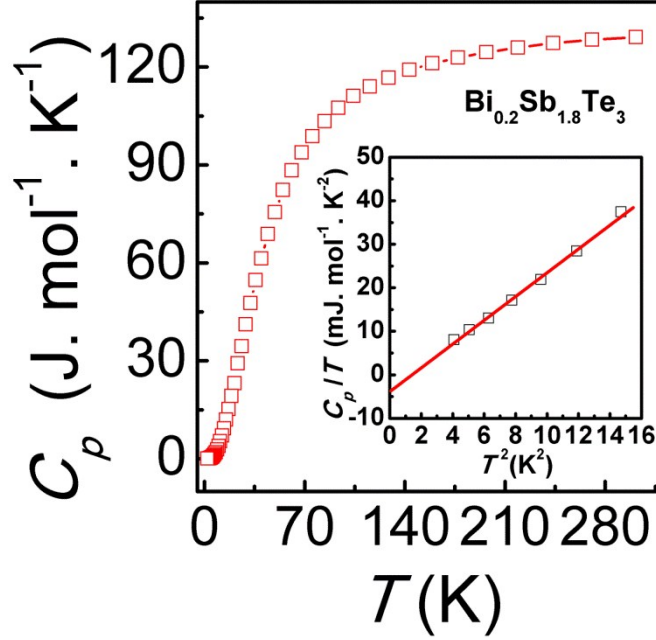

Figure S11: Temperature dependence of the heat capacity of  $\text{Bi}_{0.2}\text{Sb}_{1.8}\text{Te}_3$  synthesized by TIFS-PAS.



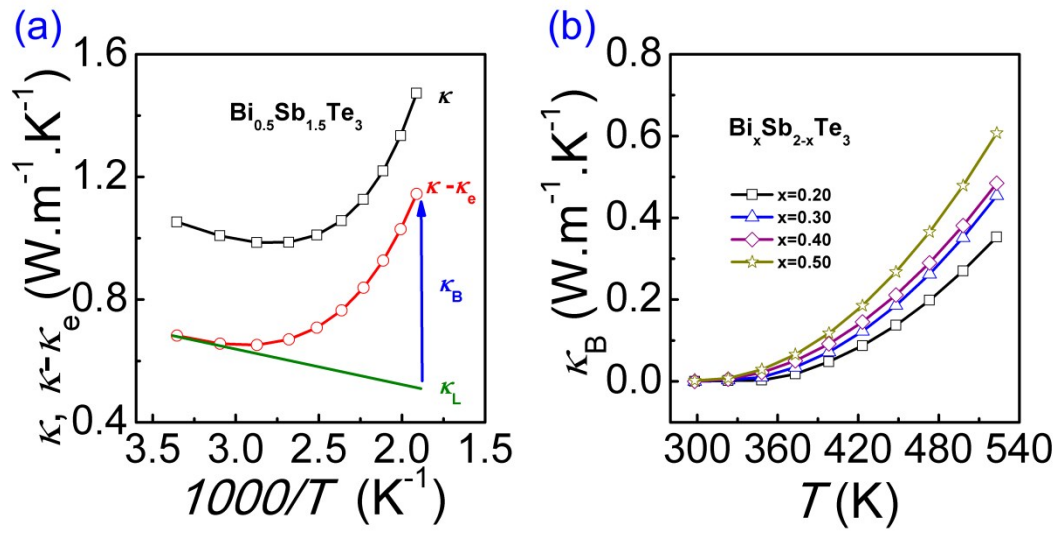

Figure S12: (a) Bipolar thermal conductivity of Bi<sub>0.5</sub>Sb<sub>1.5</sub>Te<sub>3</sub> synthesized by TIFS-PAS; (b) Temperature dependence of the bipolar thermal conductivity of Bi<sub>x</sub>Sb<sub>2-x</sub>Te<sub>3</sub> synthesized by TIFS-PAS.

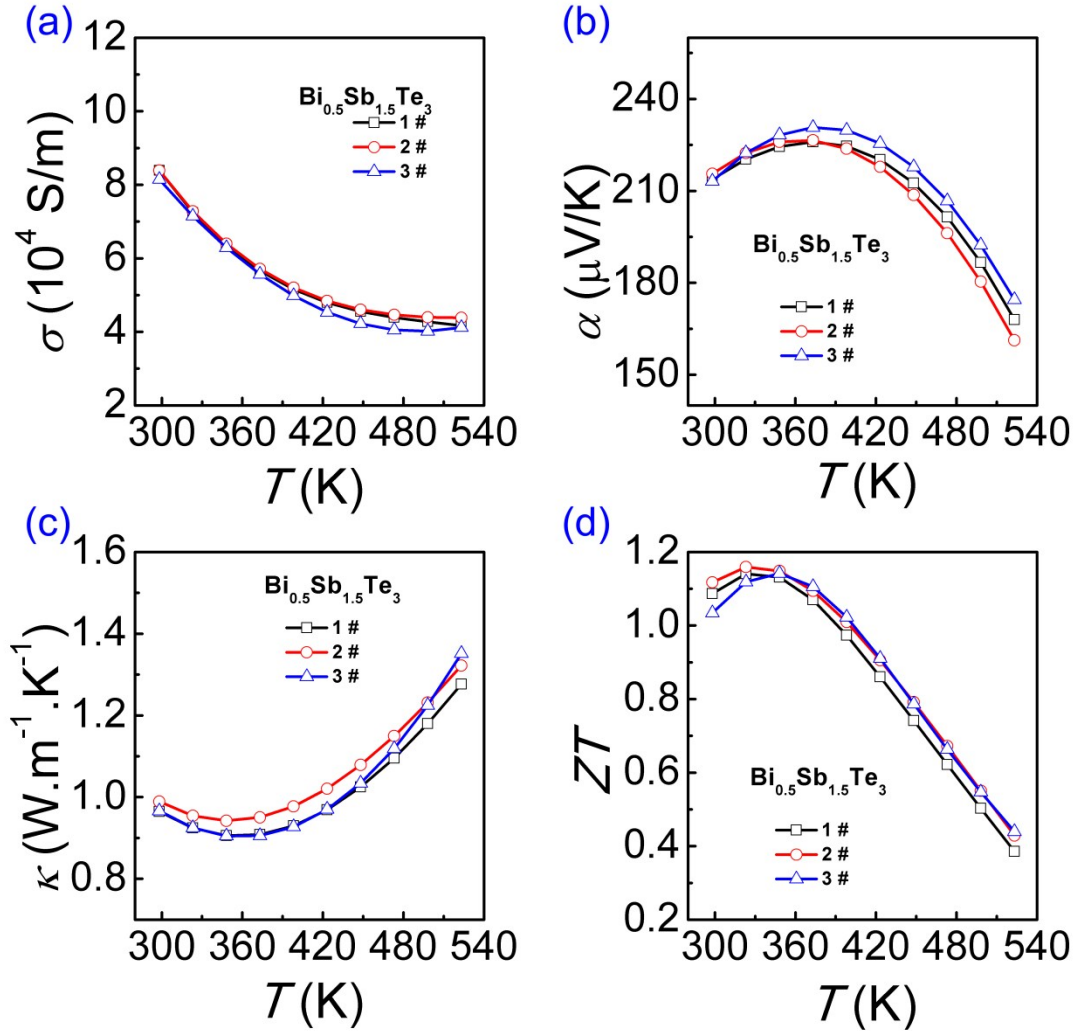

Figure S13: Thermoelectric properties of  $\text{Bi}_{0.5}\text{Sb}_{1.5}\text{Te}_3$  samples processed by three independent TIFS-PAS syntheses.

- (a) Electrical conductivity; (b) Seebeck coefficient; (c) Thermal conductivity; (d) Dimensionless figure of merit  $ZT$ .

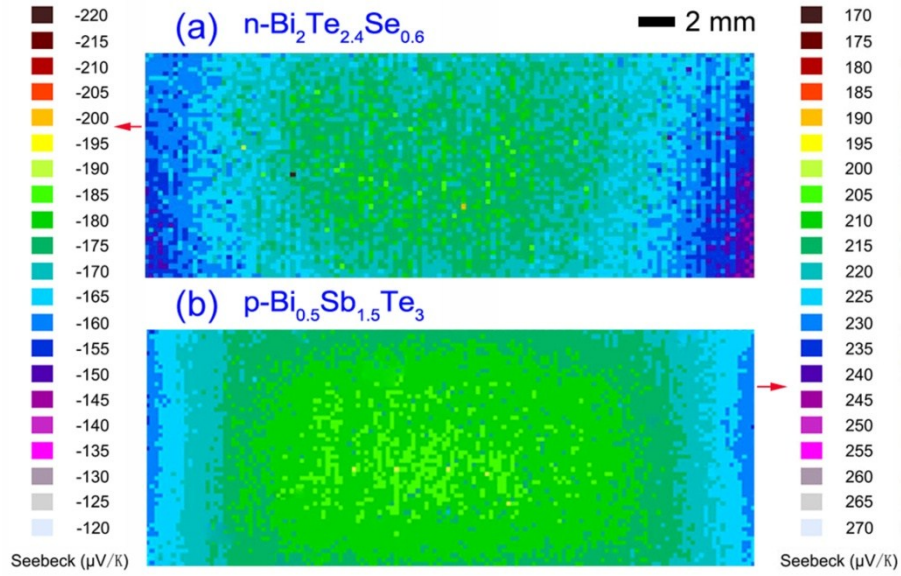

Figure S14: Distribution of Seebeck coefficients over the cross section of samples with the size  $\Phi 30 \times 12 \text{ mm}^3$ . (a)  $n\text{-Bi}_2\text{Te}_{2.4}\text{Se}_{0.6}$ ; (b)  $p\text{-Bi}_{0.5}\text{Sb}_{1.5}\text{Te}_3$ .

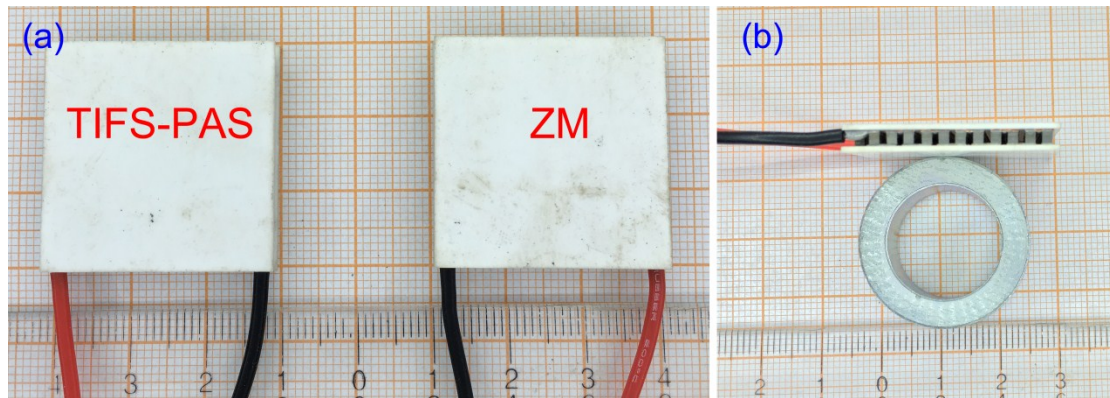

Figure S15: (a) and (b) Image of Modules ( $30 \times 30 \times 3.8 \text{ mm}^3$ ) assembled from TIFS-PAS thermoelectric materials and Zone Melting ingots (ZM) with a total of 71 pairs of n-p  $\text{Bi}_2\text{Te}_3$  based materials for each module.

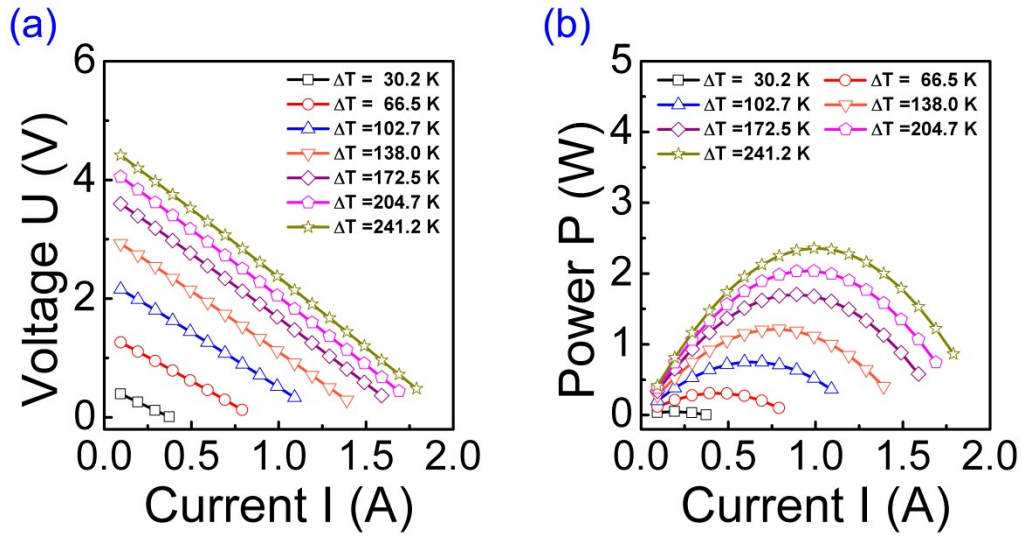

Figure S16: The output performance of a commercial module fabricated by using Zone Melting ingot materials.

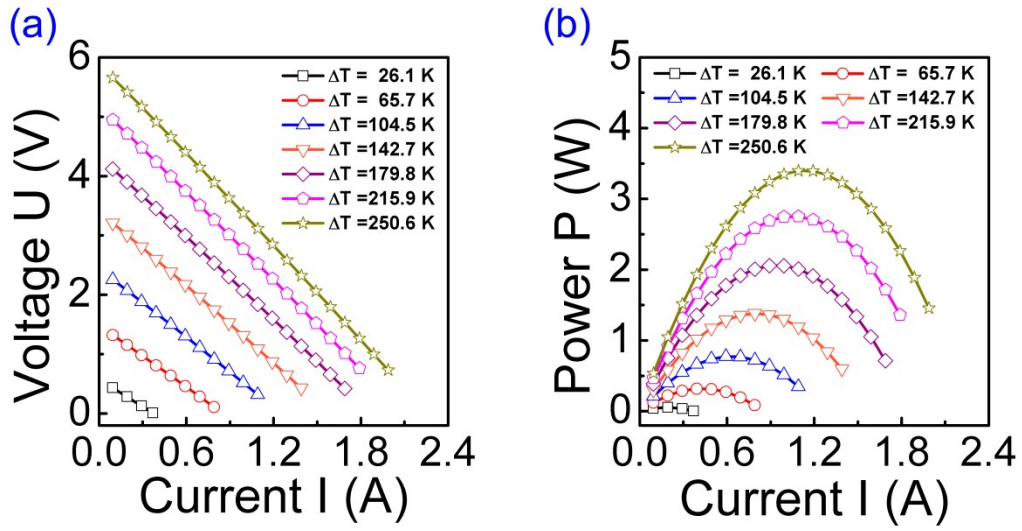

Figure S17: The output performance of a module fabricated from TIFS-PAS-processed materials.

Table S1. Fitting parameters for the heat capacity of  $\text{Bi}_x\text{Sb}_{2-x}\text{Te}_3$  ( $x=0.0\sim 0.6$ ) compounds.

|      | $\alpha$<br>( $\text{mJ mol}^{-1} \text{K}^{-2}$ ) | $\beta$<br>( $\text{mJ mol}^{-1} \text{K}^{-2}$ ) | $A_1$<br>( $\text{J mol}^{-1} \text{K}^{-2}$ ) | $\Theta_{\text{E1}}$<br>(K) | $A_2$<br>( $\text{J mol}^{-1} \text{K}^{-2}$ ) | $\Theta_{\text{E2}}$<br>(K) | $m^*/m_e$ | $\theta_{\text{D}}$<br>(K) |
|------|----------------------------------------------------|---------------------------------------------------|------------------------------------------------|-----------------------------|------------------------------------------------|-----------------------------|-----------|----------------------------|
| 0.00 | 0.32                                               | 2.09                                              | 1.74                                           | 33                          | 13.58                                          | 63                          | 0.47      | 167                        |
| 0.20 | 0.55                                               | 2.23                                              | 3.11                                           | 38                          | 18.10                                          | 74                          | 0.92      | 163                        |
| 0.30 | 0.53                                               | 2.33                                              | 2.38                                           | 36                          | 10.52                                          | 64                          | 1.03      | 161                        |
| 0.40 | 0.52                                               | 2.39                                              | 1.38                                           | 31                          | 10.88                                          | 56                          | 1.05      | 160                        |
| 0.50 | 0.50                                               | 2.45                                              | 2.72                                           | 36                          | 10.66                                          | 64                          | 1.14      | 158                        |
| 0.60 | 0.26                                               | 2.60                                              | 3.99                                           | 39                          | 7.11                                           | 62                          | 0.83      | 155                        |

Table S2. Performance parameters of the fabricated modules.

|     | $T/^{\circ}\text{C}$ | $\Delta T/$ | $T_{\text{h}}/^{\circ}\text{C}$ | $T_{\text{c}}/^{\circ}\text{C}$ | $Q/\text{J s}^{-1}$ | $R_2/\Omega$ | $R_{1\text{max}}/\Omega$ | $P_{\text{max}}/\text{W}$ | $\eta_{\text{max}}/\%$ |
|-----|----------------------|-------------|---------------------------------|---------------------------------|---------------------|--------------|--------------------------|---------------------------|------------------------|
| 100 | ZM                   | 66.5        | 81.9                            | 15.4                            | 14.3                | 1.63         | 2.01                     | 0.31                      | 2.17                   |
| 100 | TIFS-PAS             | 65.7        | 80.2                            | 14.5                            | 15.7                | 1.74         | 2.00                     | 0.32                      | 2.01                   |
| 150 | ZM                   | 102.7       | 122.2                           | 19.5                            | 24.1                | 1.83         | 2.13                     | 0.75                      | 3.11                   |
| 150 | TIFS-PAS             | 104.5       | 122.8                           | 18.3                            | 25.0                | 1.95         | 2.10                     | 0.78                      | 3.08                   |
| 200 | ZM                   | 138.0       | 162.2                           | 24.2                            | 32.5                | 2.04         | 2.51                     | 1.21                      | 3.70                   |
| 200 | TIFS-PAS             | 142.7       | 165.0                           | 22.3                            | 34.7                | 2.15         | 2.28                     | 1.38                      | 3.97                   |
| 250 | ZM                   | 172.5       | 201.0                           | 28.5                            | 42.9                | 2.16         | 2.14                     | 1.70                      | 3.92                   |
| 250 | TIFS-PAS             | 179.8       | 205.9                           | 26.1                            | 44.4                | 2.32         | 2.52                     | 2.06                      | 4.62                   |
| 300 | ZM                   | 204.7       | 238.1                           | 33.4                            | 53.1                | 2.26         | 2.07                     | 2.03                      | 3.83                   |
| 300 | TIFS-PAS             | 215.9       | 246.1                           | 30.2                            | 54.3                | 2.47         | 2.57                     | 2.75                      | 5.04                   |
| 350 | ZM                   | 241.2       | 279.2                           | 38.0                            | 64.5                | 2.32         | 2.40                     | 2.35                      | 3.65                   |
| 350 | TIFS-PAS             | 250.6       | 285.2                           | 34.6                            | 64.8                | 2.61         | 2.61                     | 3.40                      | 5.22                   |
